# Supplementary material for: Cyclometalated half-sandwich iridium(iii) and rhodium(iii) complexes as efficient agents against cancer stem-cell mammospheres
Source: Royal Society of Chemistry journal article supplement (doi:10.1039/d4qi02763a), 2025-01-01
Supplement: d4qi02763a1.pdf [file d4qi02763a1.pdf]

## Supporting Information

### Cyclometalated half-sandwich iridium(III) and rhodium(III) complexes as efficient agents against cancer stem-cell mammospheres

Dana Josa,<sup>a</sup> Piedad Herrera-Ramírez,<sup>a</sup> Xiao Feng,<sup>b</sup> Albert Gutiérrez,<sup>a</sup> David Aguilà,<sup>a</sup> Arnald Grabulosa,<sup>\*a</sup> Manuel Martínez,<sup>a</sup> Kogularamanan Suntharalingam<sup>\*b</sup> and Patrick Gamez<sup>\*acd</sup>

#### Table of Contents

|                                                                                                                                                                                                                                                                                                        |     |
|--------------------------------------------------------------------------------------------------------------------------------------------------------------------------------------------------------------------------------------------------------------------------------------------------------|-----|
| <b>Table S1.</b> Crystal data and structure refinement for compounds <b>1</b> and <b>1</b> ·DMSO.                                                                                                                                                                                                      | S3  |
| <b>Table S2.</b> Selected bond distances (Å) and angles (°) for compounds <b>1</b> , <b>1</b> ·DMSO and <b>2</b> ·DMSO.                                                                                                                                                                                | S4  |
| <b>Figure S1.</b> Representation of the solid-state structure of <b>2</b> .                                                                                                                                                                                                                            | S5  |
| <b>Figure S2.</b> Representations of the solid-state structures of <b>1</b> ·DMSO and <b>2</b> ·DMSO.                                                                                                                                                                                                  | S5  |
| <b>Table S3.</b> Crystal data and structure refinement for compound <b>2</b> ·DMSO                                                                                                                                                                                                                     | S6  |
| <b>Figure S3.</b> a) UV-Vis time-resolved spectral changes of a 20% DMSO aqueous solution of <b>2</b> (10 μM) recorded at 25 °C for 4 minutes, in the range 600–280 nm. b) Eyring plots for the temperature dependence of the reactions of 10 μM 20 % DMSO aqueous solution of <b>1</b> and <b>2</b> . | S7  |
| <b>Figure S4.</b> a) UV-Vis time-resolved spectral changes of a 20% DMSO aqueous solution of <b>1</b> ·DMSO at 50 °C. b) Eyring plots for the temperature dependence of the reactions of 5-10 μM 20 % DMSO aqueous solution of <b>1</b> ·DMSO and <b>2</b> ·DMSO.                                      | S7  |
| <b>Figure S5.</b> ESI mass spectra (positive mode) of <b>1</b> (500 μM) in H <sub>2</sub> O:DMSO (5:1) after incubation for (A) 0 h, (B) 24 h, (C) 48 h or (D) 72 h at 37 °C.                                                                                                                          | S8  |
| <b>Figure S6.</b> ESI mass spectra (positive mode) of <b>1</b> (500 μM) in H <sub>2</sub> O:DMSO (5:1) in the presence of glutathione (500 μM) after incubation for (A) 0 h, (B) 24 h, (C) 48 h or (D) 72 h at 37 °C.                                                                                  | S8  |
| <b>Figure S7.</b> ESI mass spectra (positive mode) of <b>2</b> (500 μM) in H <sub>2</sub> O:DMSO (5:1) after incubation for (A) 0 h, (B) 24 h, (C) 48 h or (D) 72 h at 37 °C.                                                                                                                          | S9  |
| <b>Figure S8.</b> ESI mass spectra (positive mode) of <b>2</b> (500 μM) in H <sub>2</sub> O:DMSO (5:1) in the presence of glutathione (500 μM) after incubation for (A) 0 h, (B) 24 h, (C) 48 h or (D) 72 h at 37 °C.                                                                                  | S9  |
| <b>Figure S9.</b> Percentages of DNA Form II (nicked/open circle) detected in the different gel electrophoresis lanes                                                                                                                                                                                  | S10 |
| <b>Figure S10.</b> Representative dose-response curves for the treatment of HMLER cells with <b>1</b> and <b>2</b> after 72 h incubation.                                                                                                                                                              | S10 |
| <b>Figure S11.</b> Representative dose-response curves for the treatment of HMLER-shEcad cells with <b>1</b> and <b>2</b> after 72 h incubation.                                                                                                                                                       | S11 |
| <b>Figure S12.</b> Representative dose-response curves for the treatment of BEAS-2B cells with <b>1</b> and <b>2</b> after 72 h incubation.                                                                                                                                                            | S11 |
| <b>Figure S13.</b> Representative dose-response curves for the treatment of HMLER-shEcad mammospheres with <b>1</b> after 5 days incubation.                                                                                                                                                           | S11 |

|                                                                                                                                                                                                                             |     |
|-----------------------------------------------------------------------------------------------------------------------------------------------------------------------------------------------------------------------------|-----|
| <b>Figure S14.</b> Representative dose-response curves for the treatment of HMLER-shEcad mammospheres with <b>2</b> after 5 days incubation.                                                                                | S12 |
| <b>Figure S15.</b> Representative dose-response curves for the treatment of HMLER-shEcad cells with <b>1</b> in the presence of IM-54 (10 $\mu$ M), necrostatin-1 (20 $\mu$ M) or z-VAD-FMK (5 $\mu$ M).                    | S12 |
| <b>Figure S16.</b> Immunoblotting analysis of proteins related to the necroptosis pathway. Protein expression in HMLER-shEcad cells following treatment with <b>1</b> (0.32, 0.63, and 1.26 $\mu$ M) after 72 h incubation. | S12 |
| <b>Figure S17.</b> Representative dose-response curves for the treatment of HMLER-shEcad cells with <b>1</b> in the presence of ABT-888 (10 $\mu$ M) or ANA (10 $\mu$ M).                                                   | S13 |
| <b>Figure S18.</b> $^{31}\text{P}\{^1\text{H}\}$ c NMR spectrum of <b>1</b> in $\text{CDCl}_3$ .                                                                                                                            | S14 |
| <b>Figure S19.</b> $^1\text{H}$ NMR spectrum of <b>1</b> in $\text{CDCl}_3$ .                                                                                                                                               | S14 |
| <b>Figure S20.</b> $^1\text{H}$ - $^{13}\text{C}$ HSQC NMR spectrum of <b>1</b> in $\text{CDCl}_3$ .                                                                                                                        | S15 |
| <b>Figure S21.</b> $^{13}\text{C}$ NMR spectrum of <b>1</b> in $\text{CDCl}_3$ .                                                                                                                                            | S15 |
| <b>Figure S22.</b> $^{31}\text{P}\{^1\text{H}\}$ c NMR spectrum of <b>2</b> in $\text{CDCl}_3$ .                                                                                                                            | S16 |
| <b>Figure S23.</b> $^1\text{H}$ NMR spectrum of <b>2</b> in $\text{CDCl}_3$ .                                                                                                                                               | S16 |
| <b>Figure S24.</b> $^1\text{H}$ - $^{13}\text{C}$ HSQC NMR spectrum of <b>2</b> in $\text{CDCl}_3$ .                                                                                                                        | S17 |
| <b>Figure S25.</b> $^{13}\text{C}$ NMR spectrum of <b>2</b> in $\text{CDCl}_3$ .                                                                                                                                            | S17 |
| <b>Figure S26.</b> $^{31}\text{P}\{^1\text{H}\}$ c NMR spectrum of <b>1</b> ·DMSO in $\text{CDCl}_3$ .                                                                                                                      | S18 |
| <b>Figure S27.</b> $^1\text{H}$ NMR spectrum of <b>1</b> ·DMSO in $\text{CDCl}_3$ .                                                                                                                                         | S18 |
| <b>Figure S28.</b> $^1\text{H}$ - $^{13}\text{C}$ HSQC NMR spectrum of <b>1</b> ·DMSO in $\text{CDCl}_3$ .                                                                                                                  | S19 |
| <b>Figure S29.</b> $^{13}\text{C}$ NMR spectrum of <b>1</b> ·DMSO in $\text{CDCl}_3$ .                                                                                                                                      | S19 |
| <b>Figure S30.</b> $^{31}\text{P}\{^1\text{H}\}$ c NMR spectrum of <b>2</b> ·DMSO in $\text{CDCl}_3$ .                                                                                                                      | S20 |
| <b>Figure S31.</b> $^1\text{H}$ NMR spectrum of <b>2</b> ·DMSO in $\text{CDCl}_3$ .                                                                                                                                         | S20 |
| <b>Figure S32.</b> $^1\text{H}$ - $^{13}\text{C}$ HSQC NMR spectrum of <b>2</b> ·DMSO in $\text{CDCl}_3$ .                                                                                                                  | S21 |
| <b>Figure S33.</b> $^{13}\text{C}$ NMR spectrum of <b>2</b> ·DMSO in $\text{CDCl}_3$ .                                                                                                                                      | S21 |
| <b>References</b>                                                                                                                                                                                                           | S22 |

---

**Table S1.** Crystal data and structure refinement for compounds **1** and **1**·DMSO (CCDC 2390209 and 2390210, respectively).

| Compound                                                     | <b>1</b>                                                               | <b>1</b> ·DMSO                                                                           |
|--------------------------------------------------------------|------------------------------------------------------------------------|------------------------------------------------------------------------------------------|
| Empirical formula                                            | C <sub>38</sub> H <sub>33</sub> ClIrP, CH <sub>2</sub> Cl <sub>2</sub> | C <sub>40</sub> H <sub>39</sub> IrOPS, F <sub>6</sub> P, CH <sub>2</sub> Cl <sub>2</sub> |
| Formula weight (g mol <sup>-1</sup> )                        | 833.19                                                                 | 1020.84                                                                                  |
| Temperature (K)                                              | 298                                                                    | 100                                                                                      |
| Crystal system                                               | monoclinic                                                             | monoclinic                                                                               |
| Space group                                                  | <i>P</i> 2 <sub>1</sub> / <i>c</i>                                     | <i>P</i> 2 <sub>1</sub> / <i>c</i>                                                       |
| Crystal size (mm <sup>3</sup> )                              | 0.55 × 0.55 × 0.2                                                      | 0.07 × 0.04 × 0.03                                                                       |
| <i>a</i> (Å)                                                 | 10.0487(2)                                                             | 9.6150(19)                                                                               |
| <i>b</i> (Å)                                                 | 15.4228(4)                                                             | 16.708(3)                                                                                |
| <i>c</i> (Å)                                                 | 21.9385(5)                                                             | 24.477(5)                                                                                |
| $\alpha$ (°)                                                 | 90                                                                     | 90                                                                                       |
| $\beta$ (°)                                                  | 102.3600(10)                                                           | 90.22(3)                                                                                 |
| $\gamma$ (°)                                                 | 90                                                                     | 90                                                                                       |
| <i>V</i> (Å <sup>3</sup> )                                   | 3321.20(13)                                                            | 3932.1(14)                                                                               |
| <i>Z</i>                                                     | 4                                                                      | 4                                                                                        |
| $\rho_{\text{calcd}}$                                        | 1.666                                                                  | 1.724                                                                                    |
| $\mu$ (mm <sup>-1</sup> )                                    | 4.338                                                                  | 3.967                                                                                    |
| <i>F</i> (000)                                               | 1648                                                                   | 2024                                                                                     |
| $\vartheta$ for data collection (°)                          | 1.627– 28.725                                                          | 1.514– 29.522                                                                            |
| Reflections collected / unique                               | 32794 / 8593                                                           | 62263 / 9527                                                                             |
| Completeness to theta                                        | 1.000                                                                  | 0.953                                                                                    |
| Data / restraints / parameters                               | 8593 / 42 / 421                                                        | 9527 / 0 / 467                                                                           |
| Goodness-of-fit on <i>F</i> <sup>2</sup>                     | 1.058                                                                  | 1.086                                                                                    |
| Final <i>R</i> indices [ <i>I</i> > 2 $\sigma$ ( <i>I</i> )] | R1 = 0.0258, wR2 = 0.0609                                              | R1 = 0.0226, wR2 = 0.0612                                                                |
| <i>R</i> indices (all data)                                  | R1 = 0.0314, wR2 = 0.0630                                              | R1 = 0.0231, wR2 = 0.0615                                                                |
| largest diff. peak and hole ( <i>e</i> Å <sup>3</sup> )      | 0.445 and –1.754                                                       | 1.000 and –1.998                                                                         |

**Table S2.** Selected bond distances (Å) and angles (°) for compounds **1**, **1·DMSO** and **2·DMSO**. Representations of the solid-state structures of these compounds are shown in Figures 1 and S2, respectively. C stands for the centroid of the Cp\* ligand.

| <b>1</b>      |            |           |           |
|---------------|------------|-----------|-----------|
| Ir–Cl1        | 2.4074(7)  | Cl1–Ir–P1 | 89.86(3)  |
| Ir–P1         | 2.2585(7)  | P1–Ir–C1  | 81.60(7)  |
| Ir–C1         | 2.070(2)   | C1–Ir–Cl1 | 82.37(7)  |
| Ir–C          | 1.8725(13) | Cl1–Ir–C  | 122.56(5) |
|               |            | P1–Ir–C   | 132.84(5) |
|               |            | C1–Ir–C   | 131.34(9) |
| <b>1·DMSO</b> |            |           |           |
| Ir–S1         | 2.2897(8)  | S1–Ir–P1  | 96.47(3)  |
| Ir–P1         | 2.2963(8)  | P1–Ir–C1  | 82.18(6)  |
| Ir–C1         | 2.076(2)   | C1–Ir–S1  | 82.54(6)  |
| Ir–C          | 1.9057(11) | S1–Ir–C   | 123.96(4) |
|               |            | P1–Ir–C   | 130.49(4) |
|               |            | C1–Ir–C   | 126.17(7) |
| <b>2·DMSO</b> |            |           |           |
| Rh–S1         | 2.3141(7)  | S1–Rh–P1  | 97.08(3)  |
| Rh–P1         | 2.3054(8)  | P1–Rh–C7  | 82.47(6)  |
| Rh–C7         | 2.064(2)   | C7–Rh–S1  | 82.40(6)  |
| Rh–C          | 1.8968(11) | S1–Rh–C   | 124.07(4) |
|               |            | P1–Rh–C   | 129.91(4) |
|               |            | C7–Rh–C   | 126.07(7) |

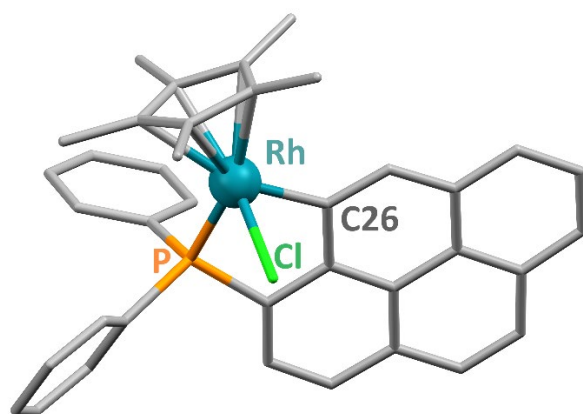

**Figure S1.** Representation of the solid-state structure of **2**.<sup>1</sup> The donor atoms coordinated to the metal centre are labelled. Hydrogen atoms are omitted for clarity.

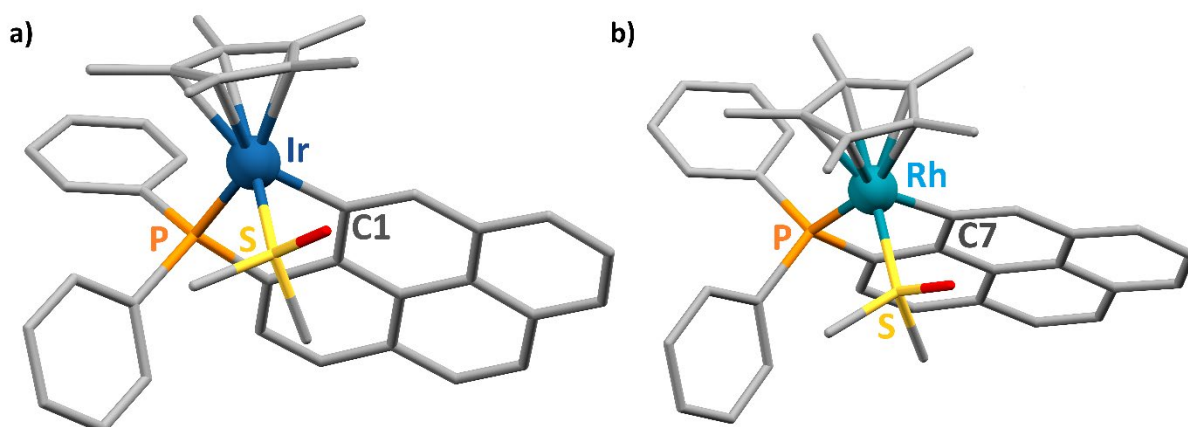

**Figure S2.** Representations of the solid-state structures of a) **1**·DMSO and b) **2**·DMSO. The donor atoms coordinated to the metal centre are labelled. Hydrogen atoms are omitted for clarity.

**Table S3.** Crystal data and structure refinement for compound **2**·DMSO (CCDC 2390211).

| Compound                                                     | <b>2</b> ·DMSO                                                                           |
|--------------------------------------------------------------|------------------------------------------------------------------------------------------|
| Empirical formula                                            | C <sub>40</sub> H <sub>39</sub> OPRhS, F <sub>6</sub> P, CH <sub>2</sub> Cl <sub>2</sub> |
| Formula weight (g mol <sup>-1</sup> )                        | 931.55                                                                                   |
| Temperature (K)                                              | 100                                                                                      |
| Crystal system                                               | monoclinic                                                                               |
| Space group                                                  | <i>P2<sub>1</sub>/c</i>                                                                  |
| Crystal size (mm <sup>3</sup> )                              | 0.13 × 0.05 × 0.05                                                                       |
| <i>a</i> (Å)                                                 | 9.6550(19)                                                                               |
| <i>b</i> (Å)                                                 | 16.670(3)                                                                                |
| <i>c</i> (Å)                                                 | 24.415(5)                                                                                |
| $\alpha$ (°)                                                 | 90                                                                                       |
| $\beta$ (°)                                                  | 90.21(3)                                                                                 |
| $\gamma$ (°)                                                 | 90                                                                                       |
| <i>V</i> (Å <sup>3</sup> )                                   | 3929.5(14)                                                                               |
| <i>Z</i>                                                     | 4                                                                                        |
| $\rho_{\text{calcd}}$                                        | 1.575                                                                                    |
| $\mu$ (mm <sup>-1</sup> )                                    | 0.816                                                                                    |
| <i>F</i> (000)                                               | 1896                                                                                     |
| $\vartheta$ for data collection (°)                          | 1.518– 29.520                                                                            |
| Reflections collected / unique                               | 64275 / 9548                                                                             |
| Completeness to theta                                        | 0.954                                                                                    |
| Data / restraints / parameters                               | 9548 / 0 / 467                                                                           |
| Goodness-of-fit on <i>F</i> <sup>2</sup>                     | 1.160                                                                                    |
| Final <i>R</i> indices [ <i>I</i> > 2 $\sigma$ ( <i>I</i> )] | <i>R</i> 1 = 0.0427, <i>wR</i> 2 = 0.1215                                                |
| <i>R</i> indices (all data)                                  | <i>R</i> 1 = 0.0428, <i>wR</i> 2 = 0.1216                                                |
| largest diff. peak and hole (e Å <sup>-3</sup> )             | 1.304 and –1.826                                                                         |

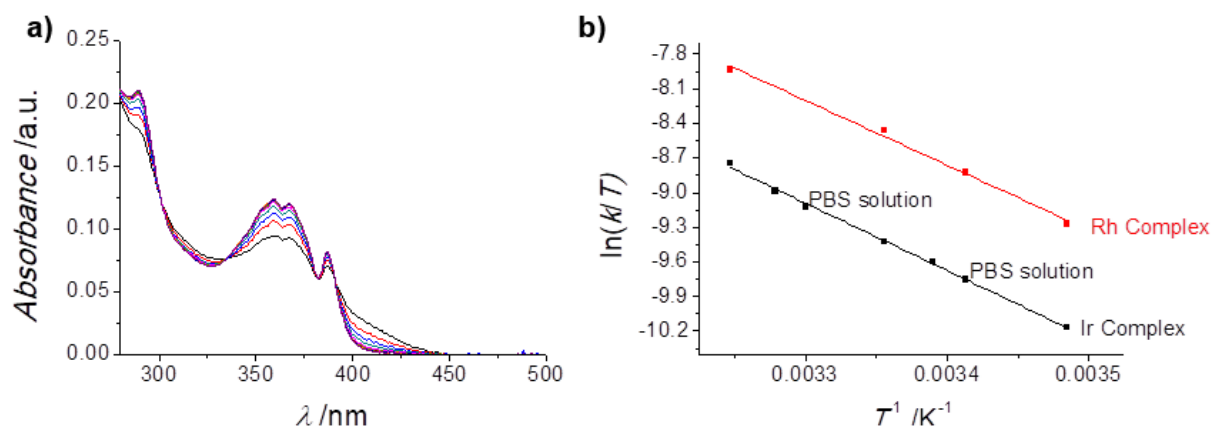

**Figure S3.** a) UV-Vis time-resolved spectral changes of a 20% DMSO aqueous solution of **2** (10  $\mu$ M) recorded at 25  $^{\circ}$ C for 4 minutes, in the range 600–280 nm. b) Eyring plots for the temperature dependence of the reactions of 10  $\mu$ M 20 % DMSO aqueous solution of **1** and **2**.

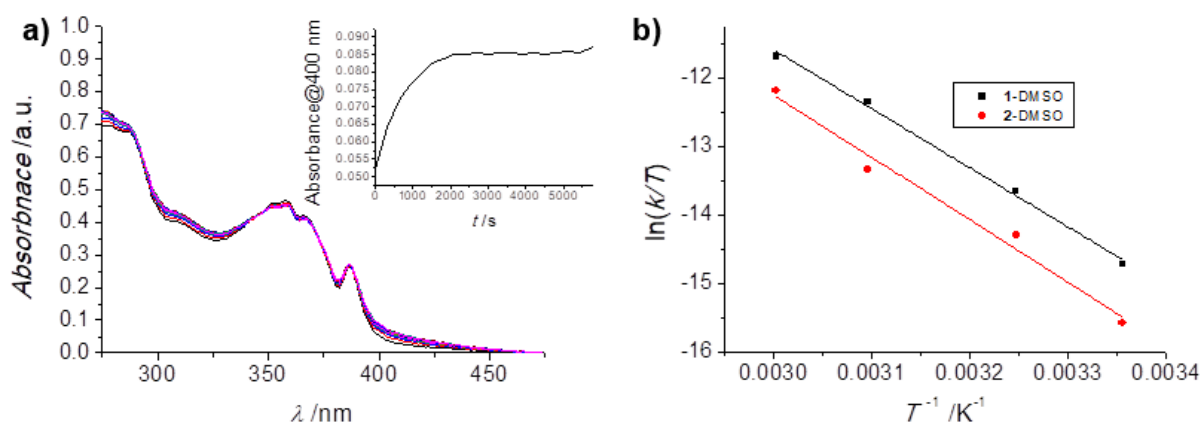

**Figure S4.** a) UV-Vis time-resolved spectral changes of a 20% DMSO aqueous solution of **1**-DMSO at 50  $^{\circ}$ C. b) Eyring plots for the temperature dependence of the reactions of 5-10  $\mu$ M 20 % DMSO aqueous solution of **1**-DMSO and **2**-DMSO.

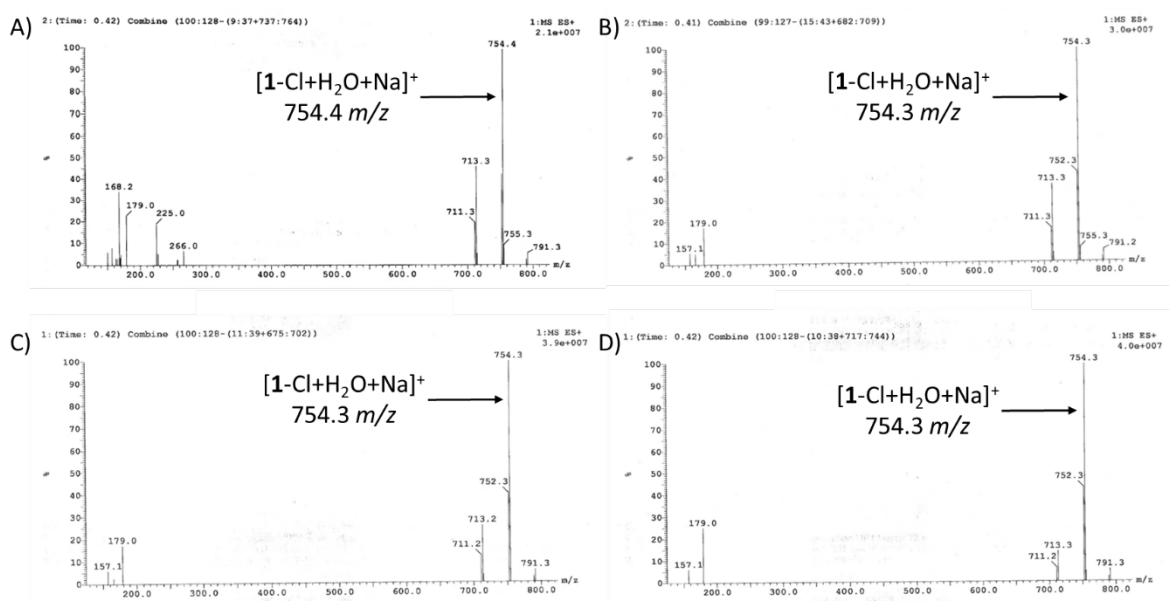

**Figure S5.** ESI mass spectra (positive mode) of **1** (500  $\mu$ M) in H<sub>2</sub>O:DMSO (5:1) after incubation for (A) 0 h, (B) 24 h, (C) 48 h or (D) 72 h at 37 °C.

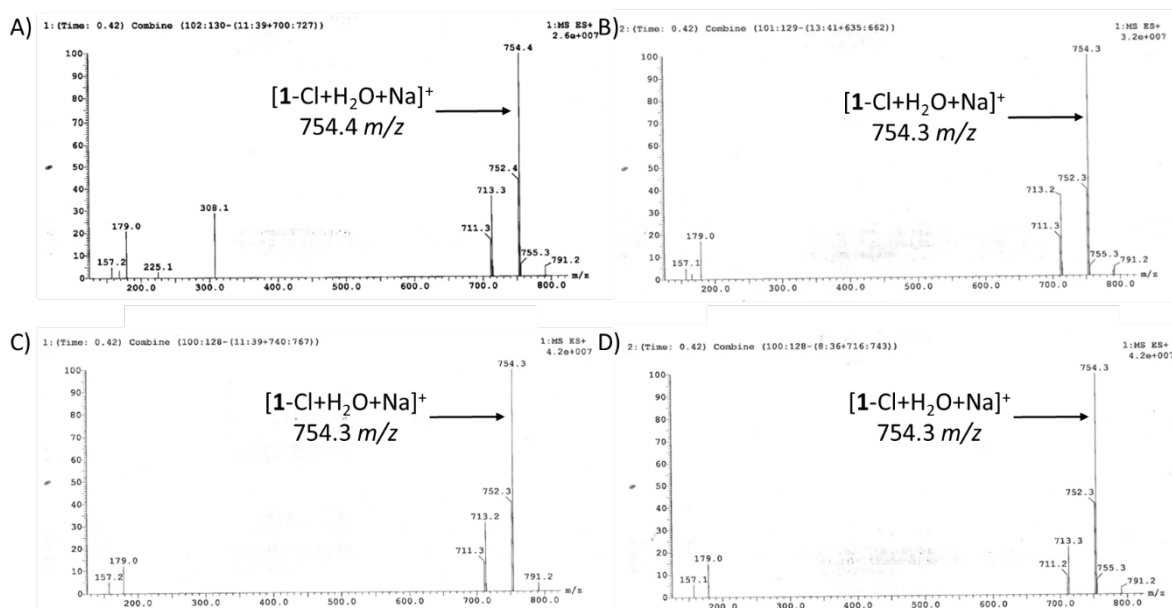

**Figure S6.** ESI mass spectra (positive mode) of **1** (500  $\mu$ M) in H<sub>2</sub>O:DMSO (5:1) in the presence of glutathione (500  $\mu$ M) after incubation for (A) 0 h, (B) 24 h, (C) 48 h or (D) 72 h at 37 °C.



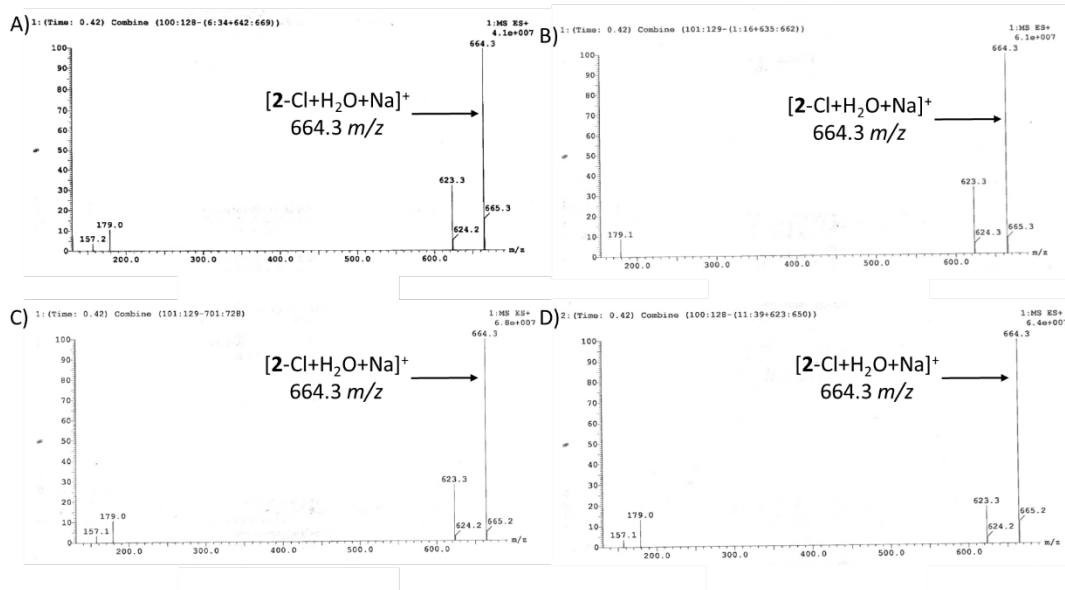

**Figure S7.** ESI mass spectra (positive mode) of **2** (500  $\mu\text{M}$ ) in  $\text{H}_2\text{O}:\text{DMSO}$  (5:1) after incubation for (A) 0 h, (B) 24 h, (C) 48 h or (D) 72 h at 37  $^\circ\text{C}$ .

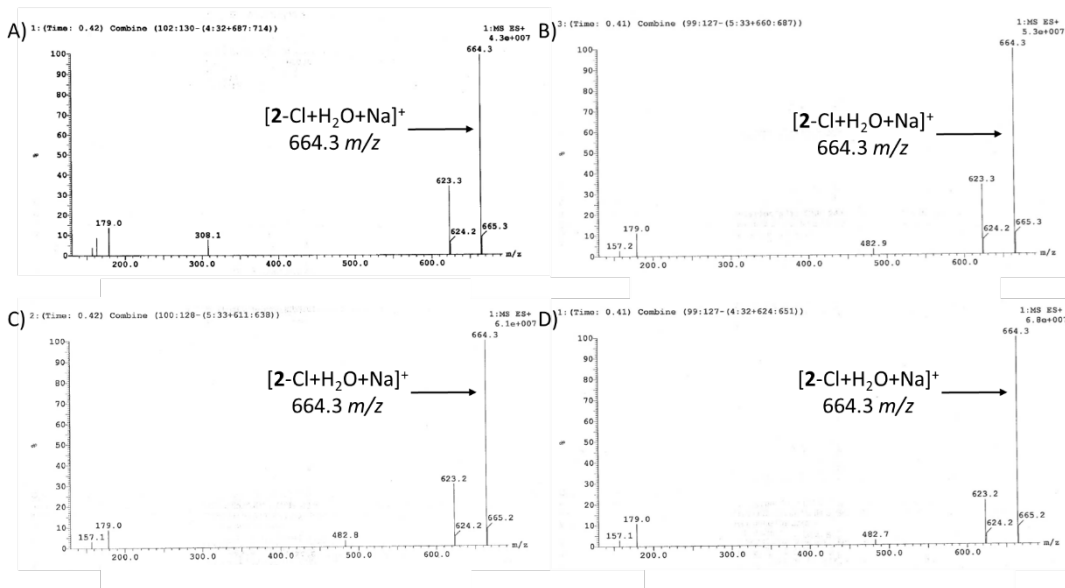

**Figure S8.** ESI mass spectra (positive mode) of **2** (500  $\mu\text{M}$ ) in  $\text{H}_2\text{O}:\text{DMSO}$  (5:1) in the presence of glutathione (500  $\mu\text{M}$ ) after incubation for (A) 0 h, (B) 24 h, (C) 48 h or (D) 72 h at 37  $^\circ\text{C}$ .

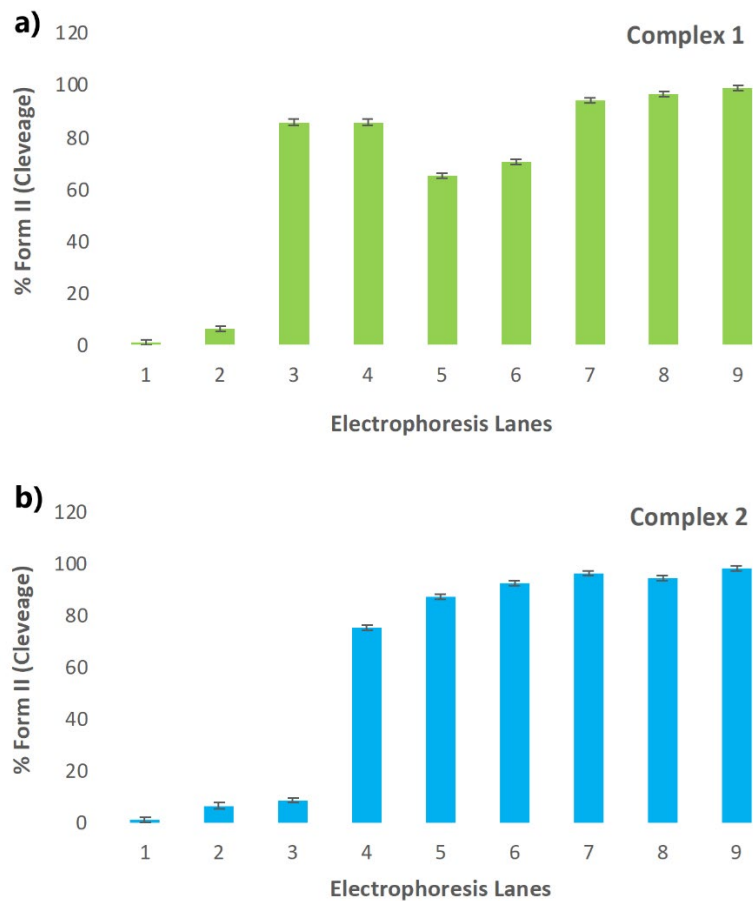

**Figure S9.** Percentages of DNA Form II (nicked/open circle) detected in the different gel electrophoresis lanes (see caption of Figure 2 in the main text for the conditions used in each lane) for a) complex 1 (in green) and b) complex 2 (in blue).

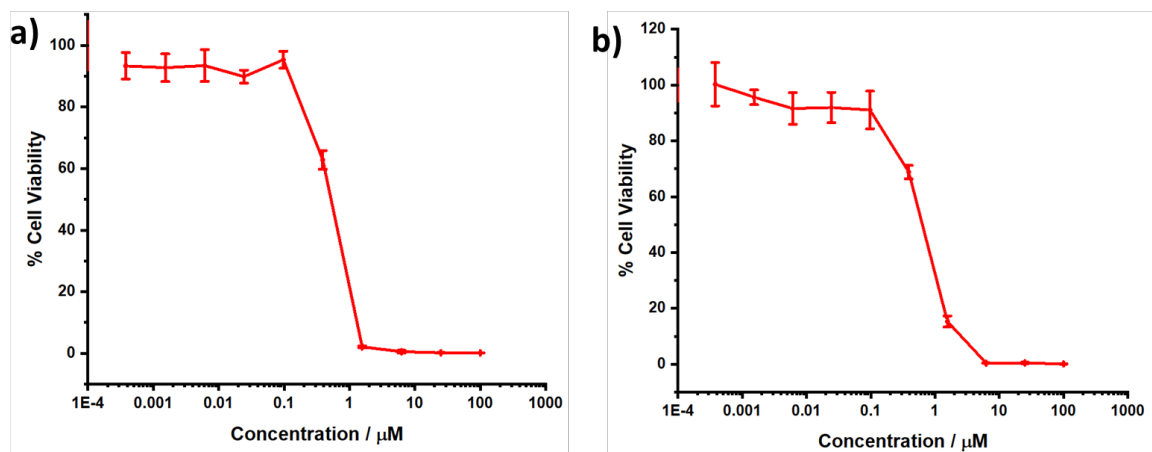

**Figure S10.** Representative dose-response curves for the treatment of HMLER cells with a) 1 and b) 2 after 72 h incubation.

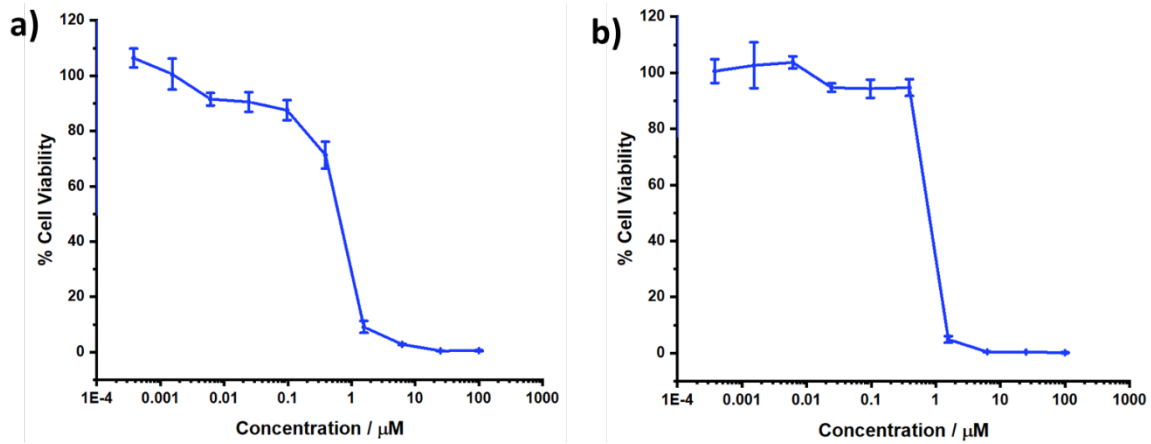

**Figure S11.** Representative dose-response curves for the treatment of HMLER-shEcad cells with a) 1 and b) 2 after 72 h incubation.

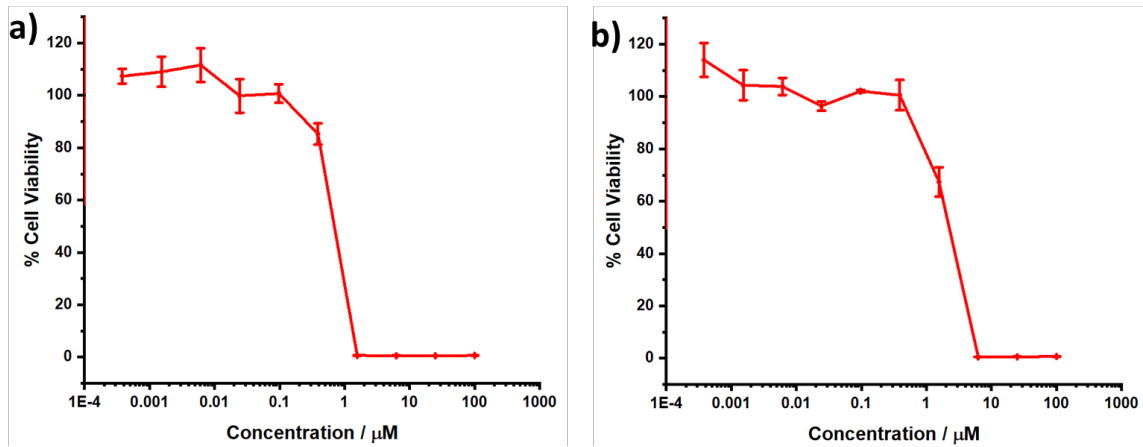

**Figure S12.** Representative dose-response curves for the treatment of BEAS-2B cells with a) 1 and b) 2 after 72 h incubation.

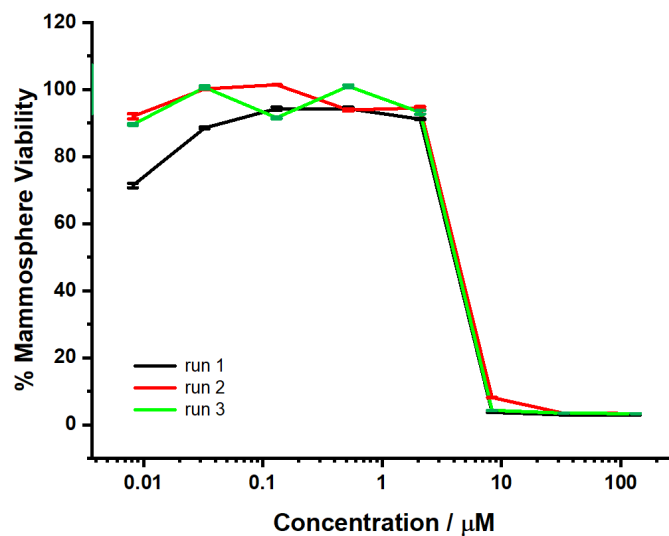

**Figure S13.** Representative dose-response curves for the treatment of HMLER-shEcad mammospheres with 1 after 5 days incubation.

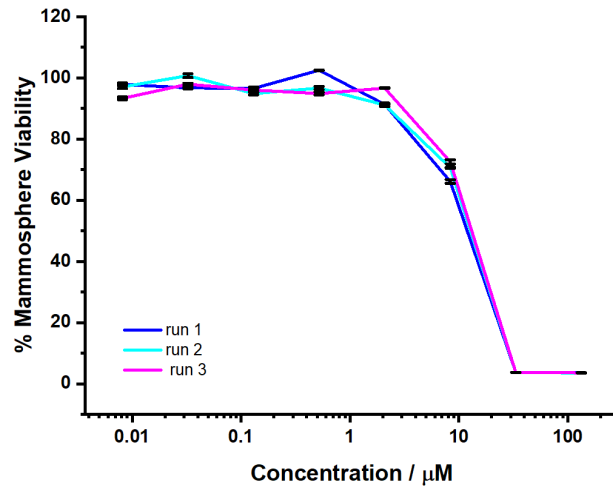

**Figure S14.** Representative dose-response curves for the treatment of HMLER-shEcad mammospheres with **2** after 5 days incubation.

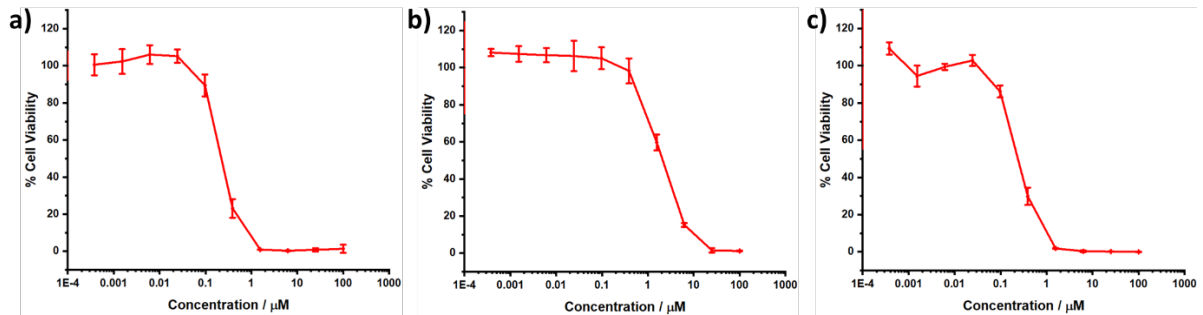

**Figure S15.** Representative dose-response curves for the treatment of HMLER-shEcad cells with **1** in the presence of a) IM-54 (10  $\mu\text{M}$ ), b) necrostatin-1 (20  $\mu\text{M}$ ) or c) z-VAD-FMK (5  $\mu\text{M}$ ).

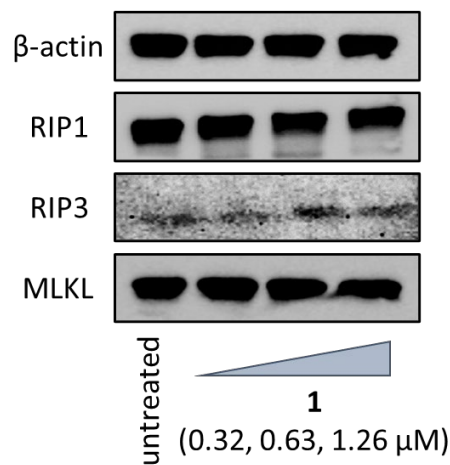

**Figure S16.** Immunoblotting analysis of proteins related to the necroptosis pathway. Protein expression in HMLER-shEcad cells following treatment with **1** (0.32, 0.63, and 1.26  $\mu\text{M}$ ) after 72 h incubation.

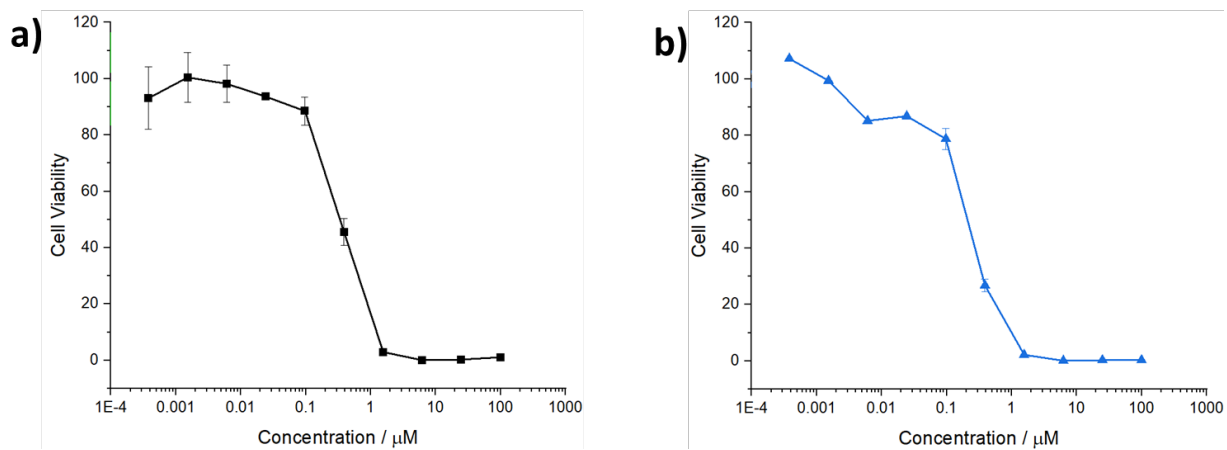

**Figure S17.** Representative dose-response curves for the treatment of HMLER-shEcad cells with **1** in the presence of a) ABT-888 (10  $\mu\text{M}$ ) or b) ANA (10  $\mu\text{M}$ ).

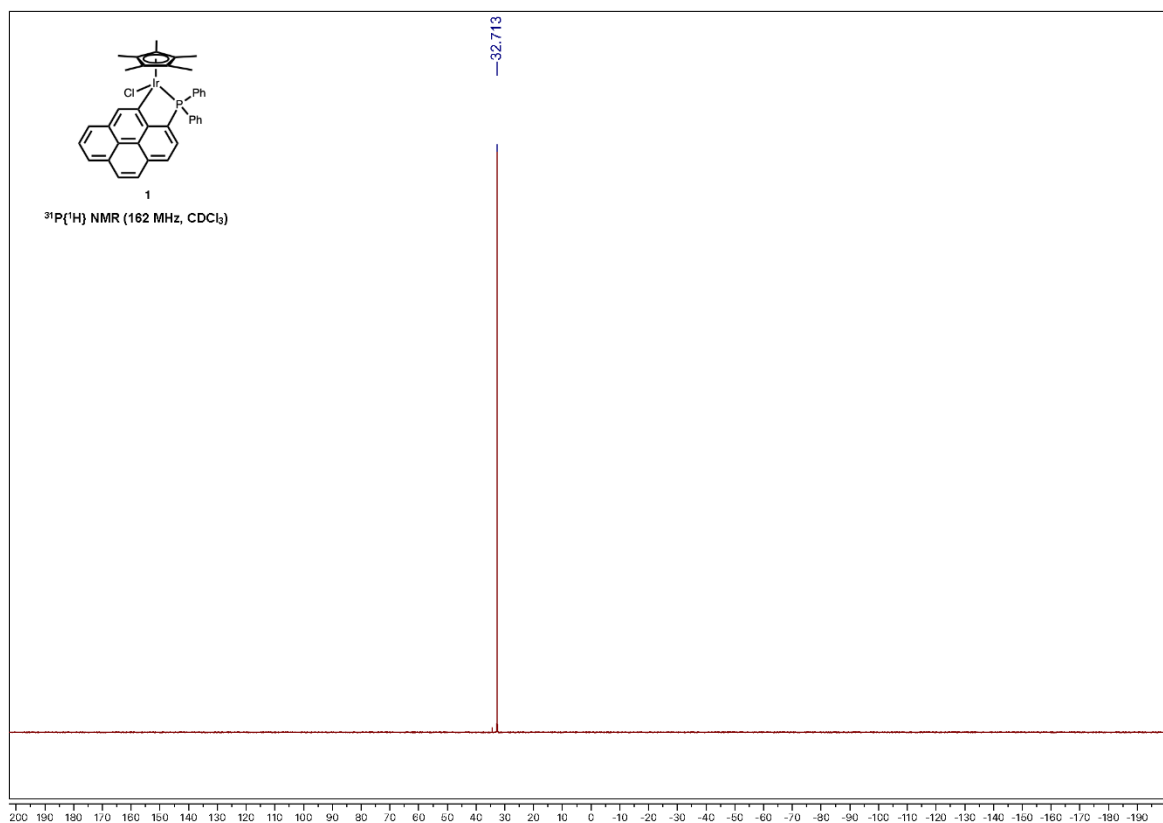

Figure S18.  $^{31}\text{P}\{^1\text{H}\}$  NMR spectrum of **1** in  $\text{CDCl}_3$ .

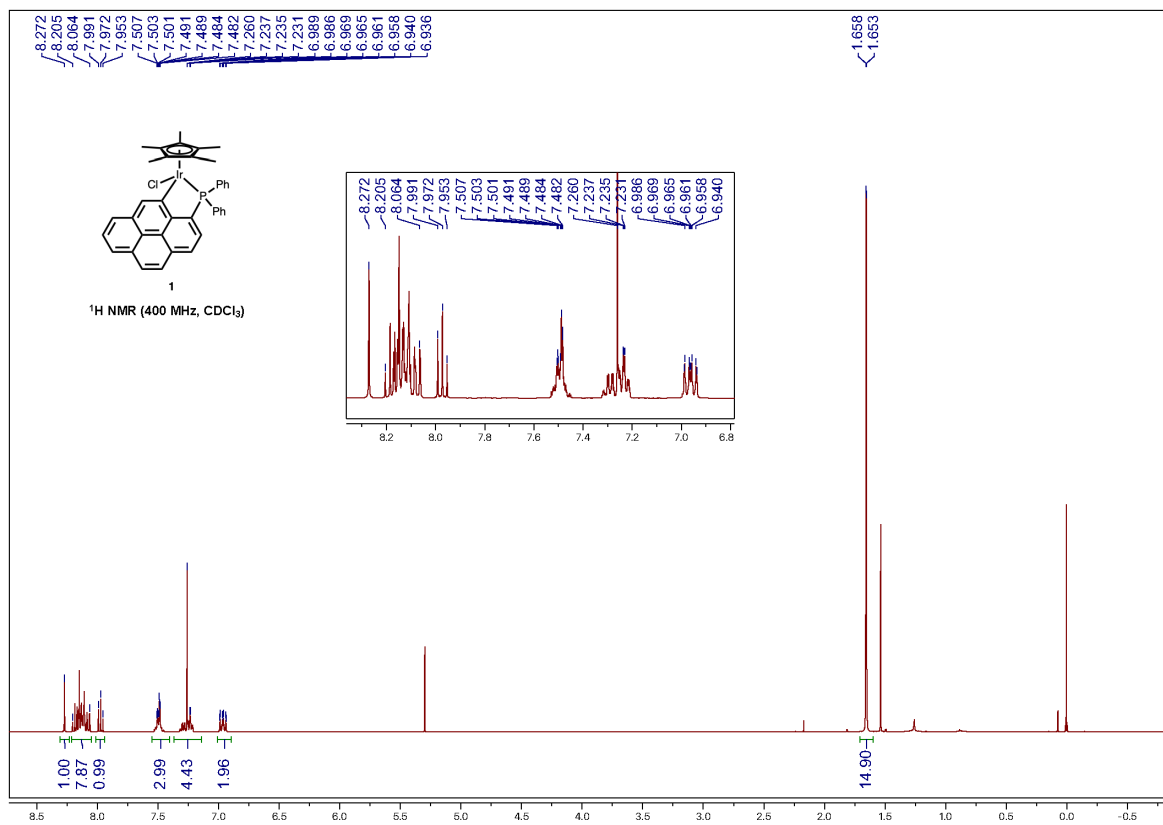

Figure S19.  $^1\text{H}$  NMR spectrum of **1** in  $\text{CDCl}_3$ .

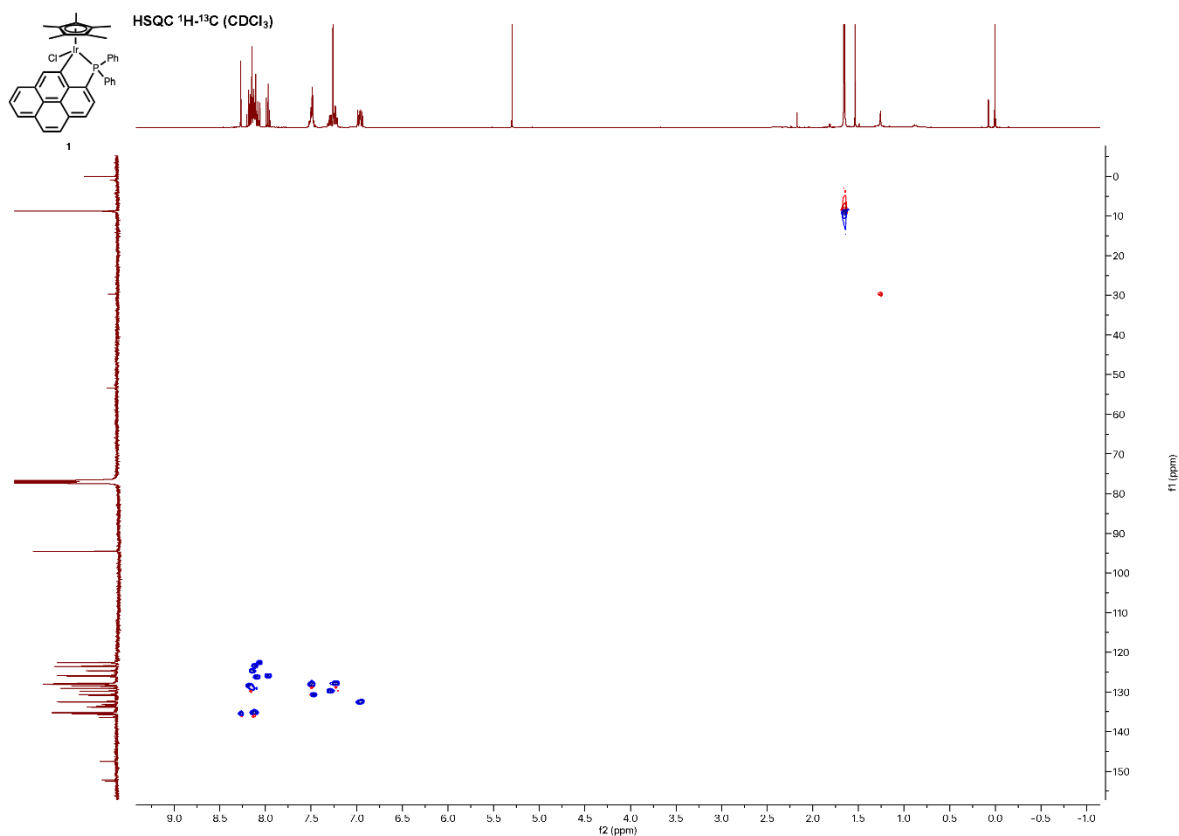

Figure S20.  $^1\text{H}$ - $^{13}\text{C}$  HSQC NMR spectrum of **1** in  $\text{CDCl}_3$ .

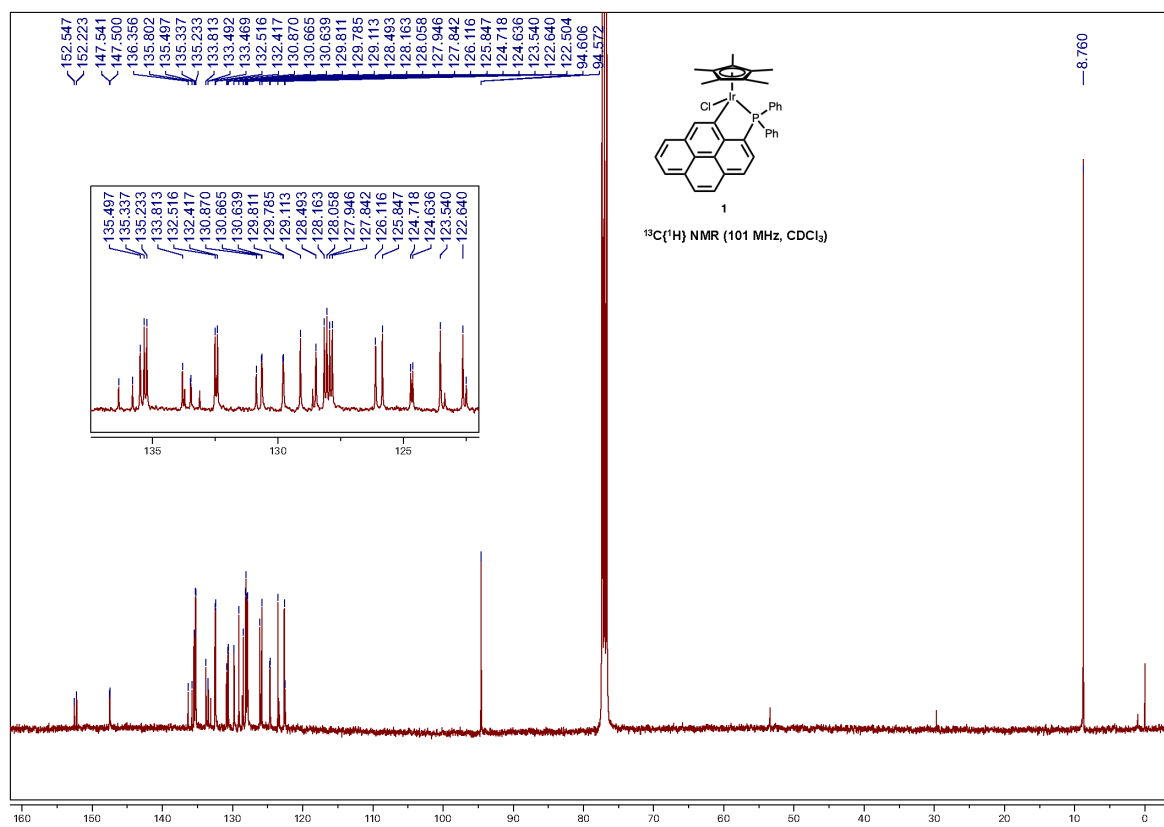

Figure S21.  $^{13}\text{C}$  NMR spectrum of **1** in  $\text{CDCl}_3$ .

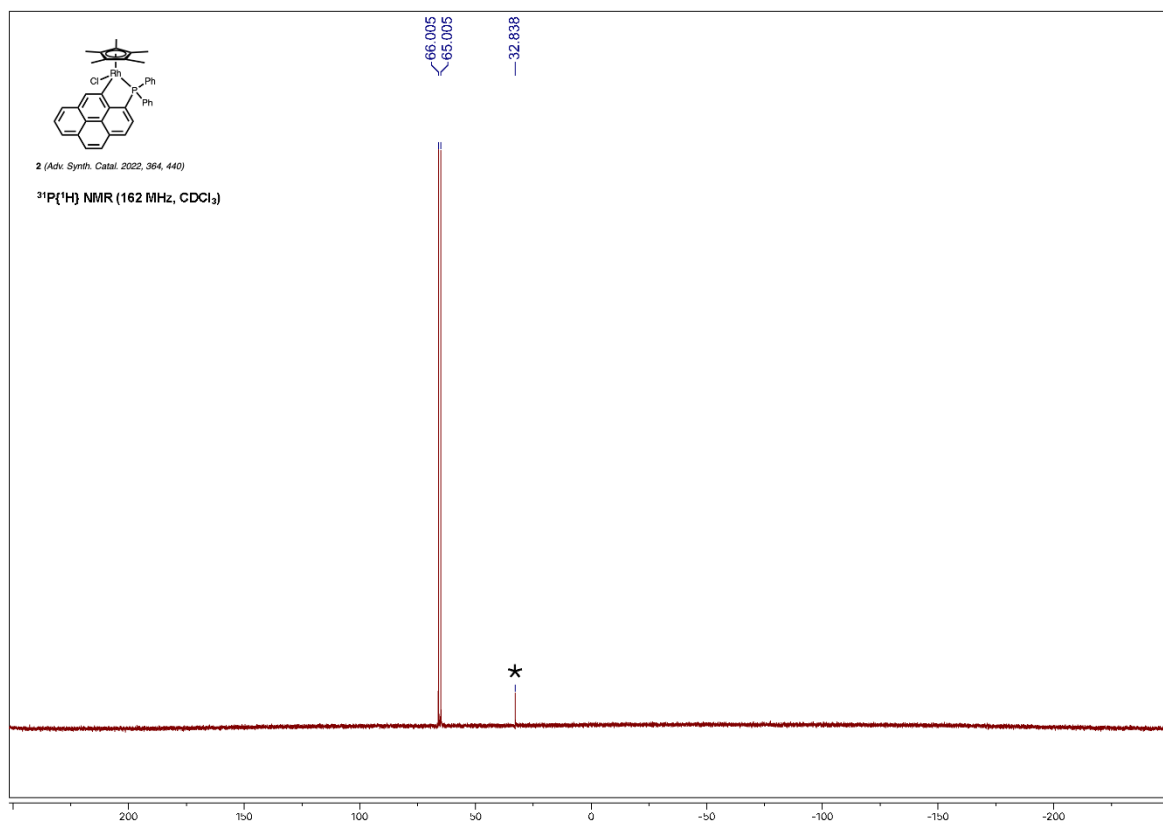

**Figure S22.**  $^{31}\text{P}\{^1\text{H}\}$  NMR spectrum of **2** in  $\text{CDCl}_3$ . \*: traces of the oxide of the free phosphane ligand.

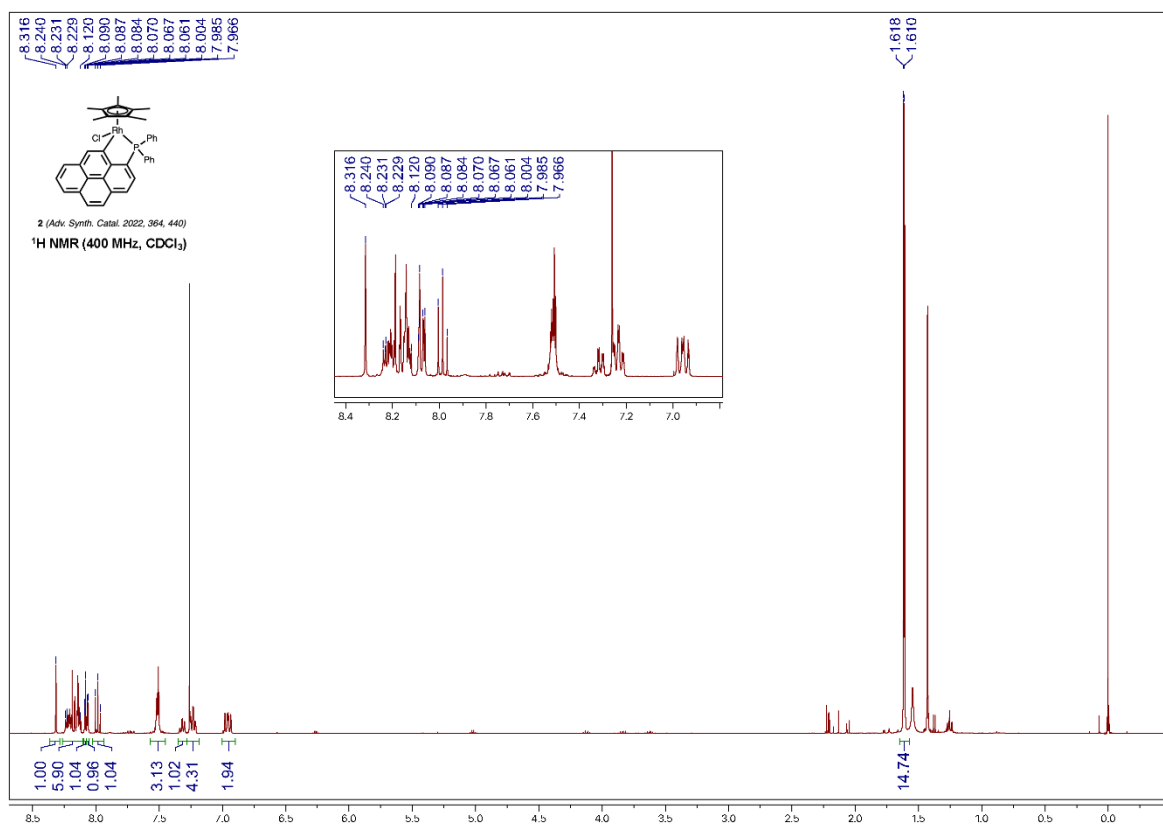

**Figure S23.**  $^1\text{H}$  NMR spectrum of **2** in  $\text{CDCl}_3$ .



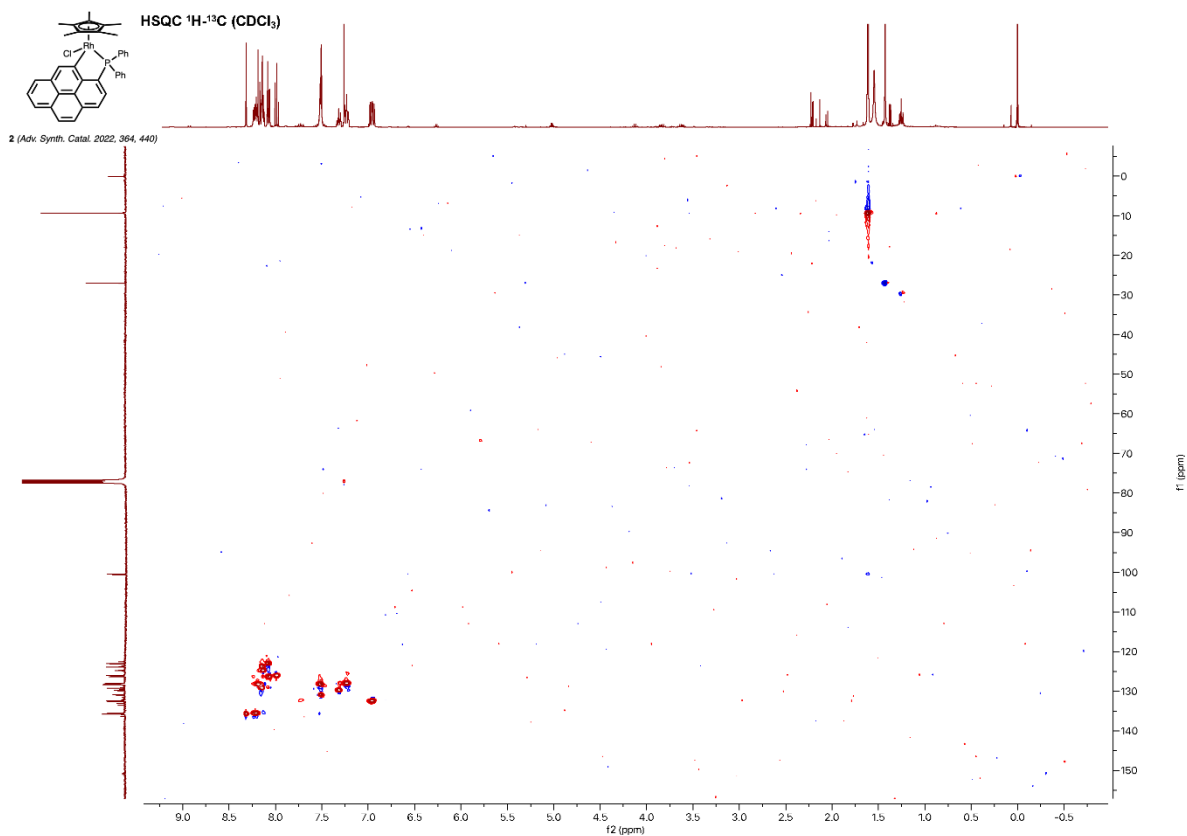

Figure S24.  $^1\text{H}$ - $^{13}\text{C}$  HSQC NMR spectrum of **2** in  $\text{CDCl}_3$ .

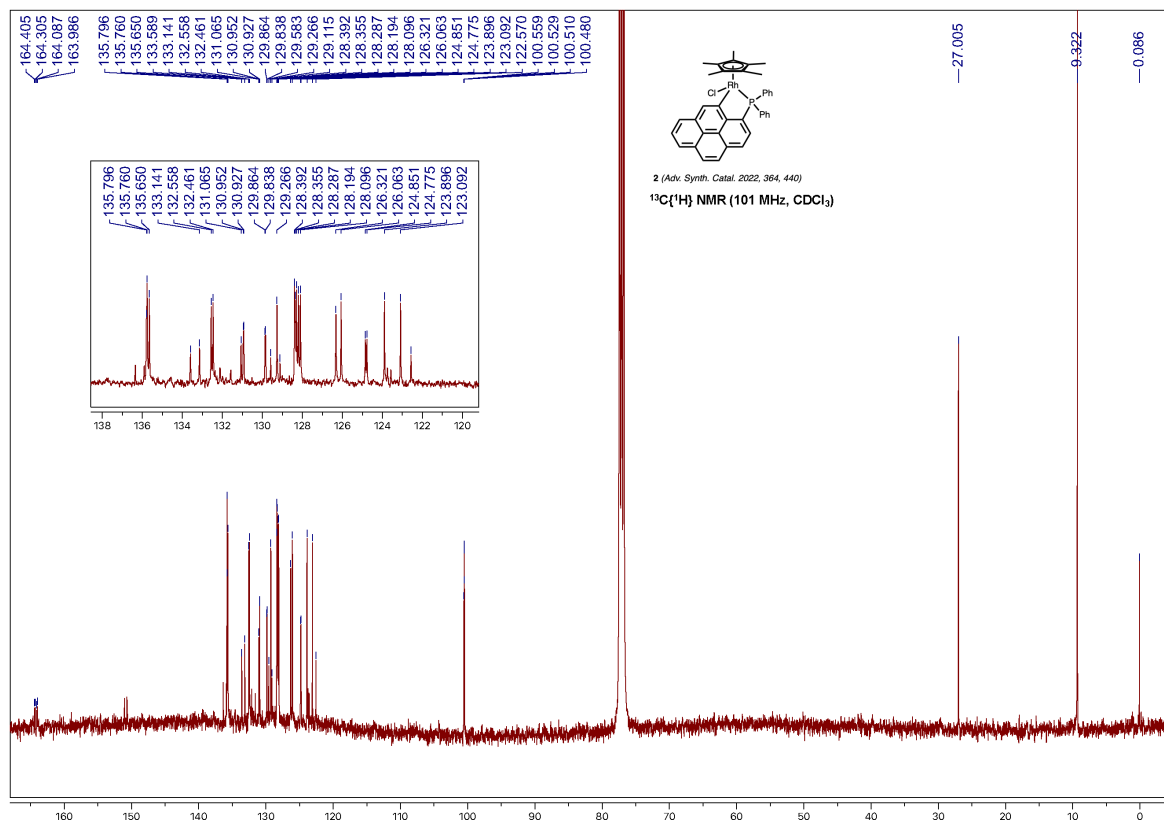

Figure S25.  $^{13}\text{C}$  NMR spectrum of **2** in  $\text{CDCl}_3$ .

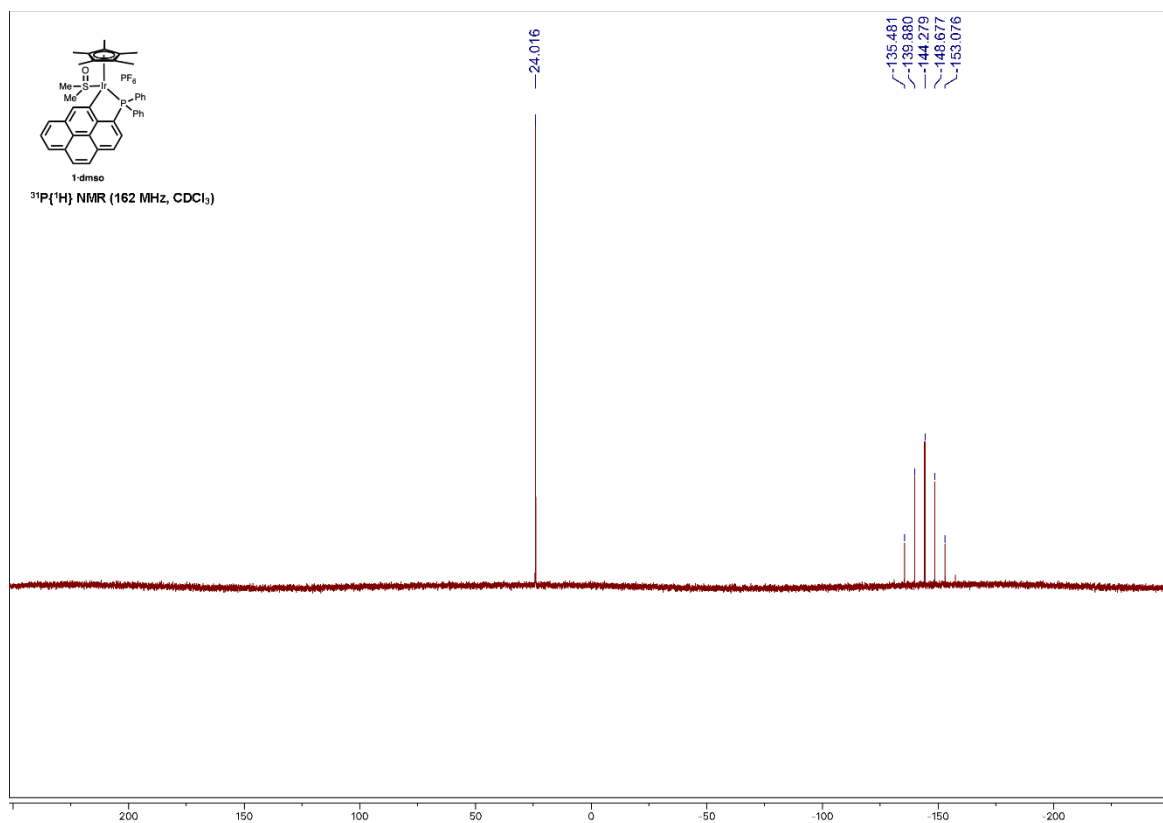

Figure S26.  $^{31}\text{P}\{^1\text{H}\}$  NMR spectrum of **1**-DMSO in  $\text{CDCl}_3$ .

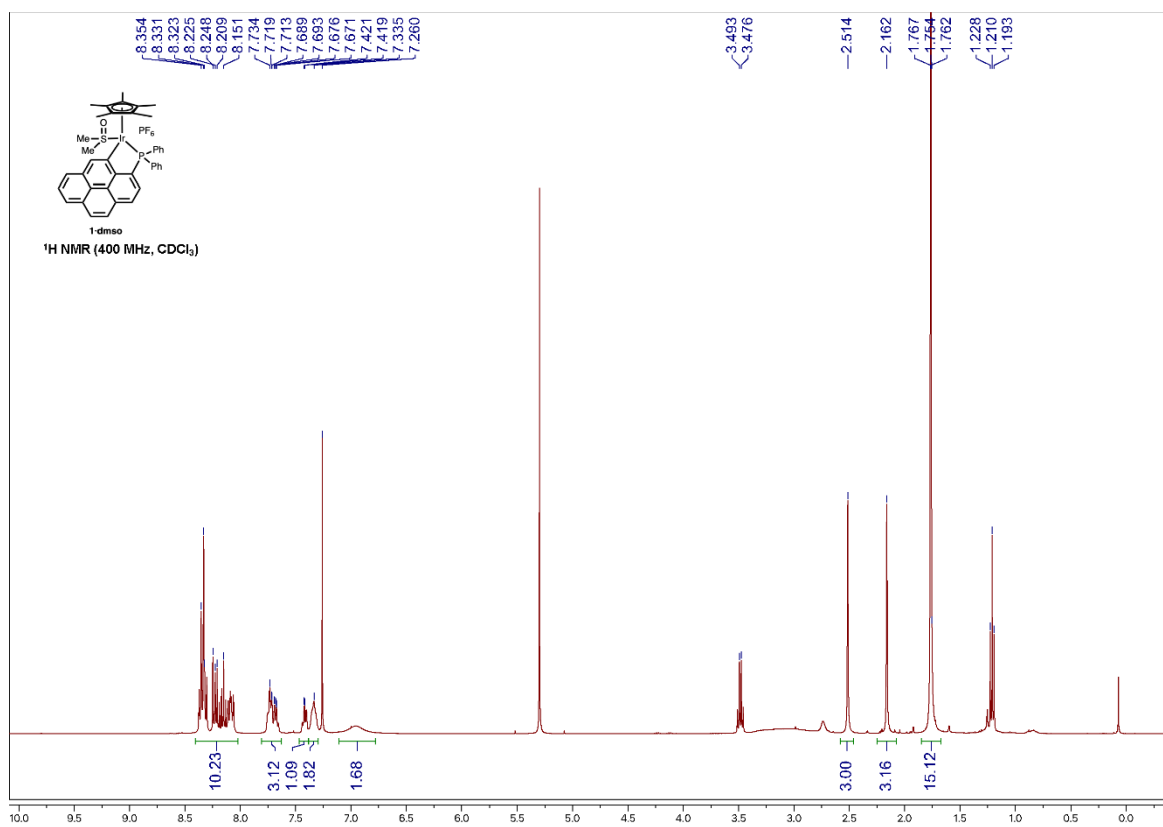

Figure S27.  $^1\text{H}$  NMR spectrum of **1**-DMSO in  $\text{CDCl}_3$ .

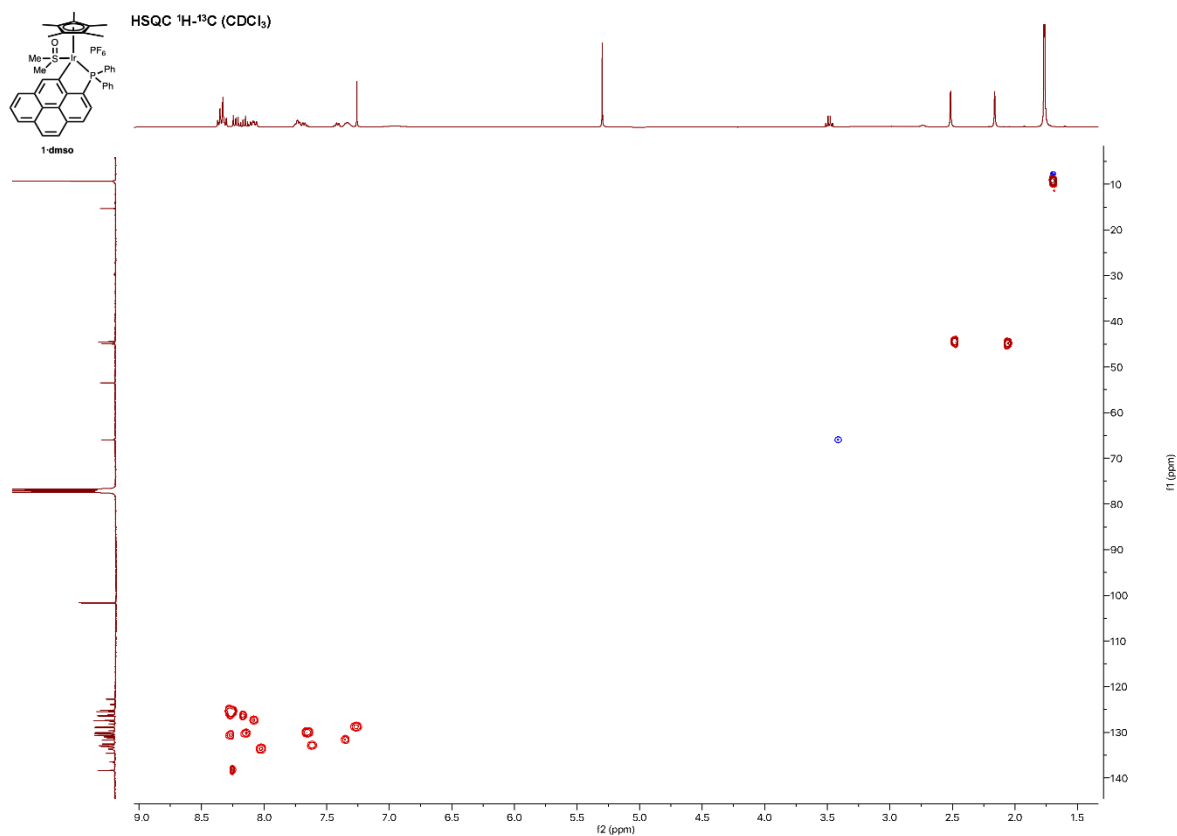

Figure S28.  $^1\text{H}$ - $^{13}\text{C}$  HSQC NMR spectrum of **1**·DMSO in  $\text{CDCl}_3$ .

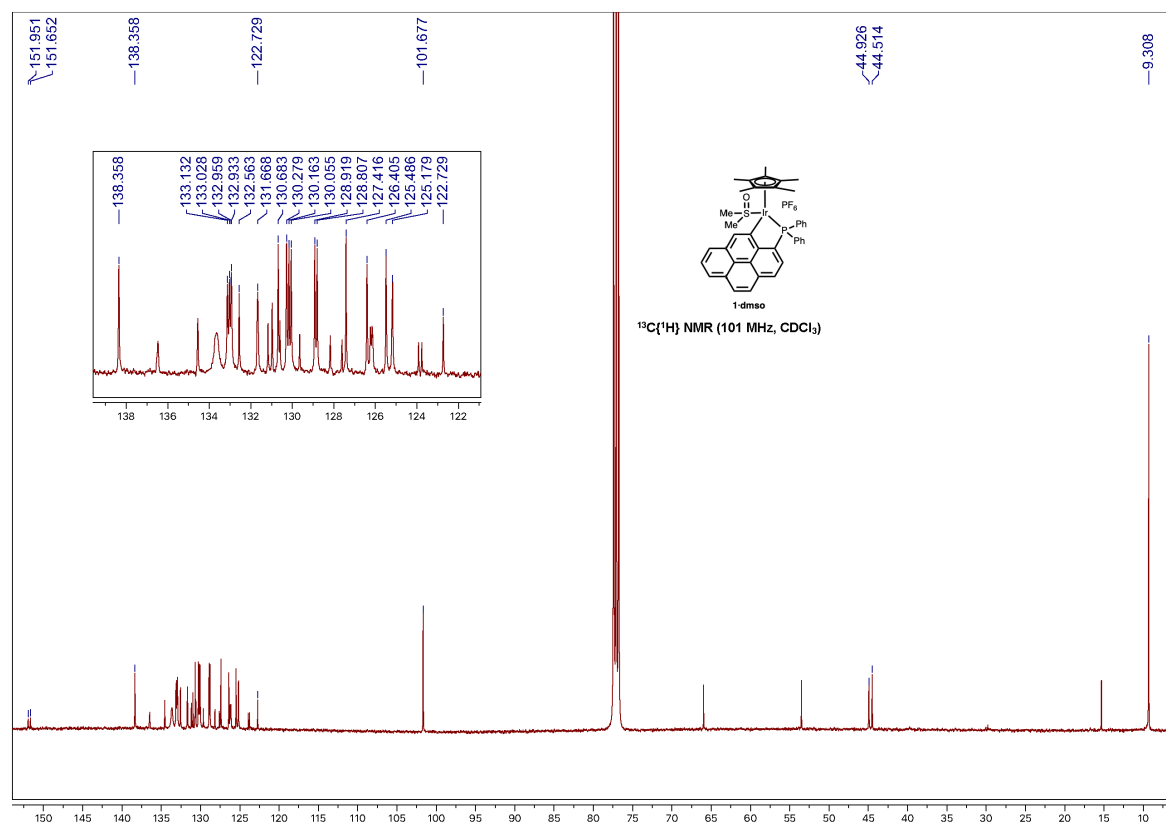

Figure S29.  $^{13}\text{C}$  NMR spectrum of **1**·DMSO in  $\text{CDCl}_3$ .

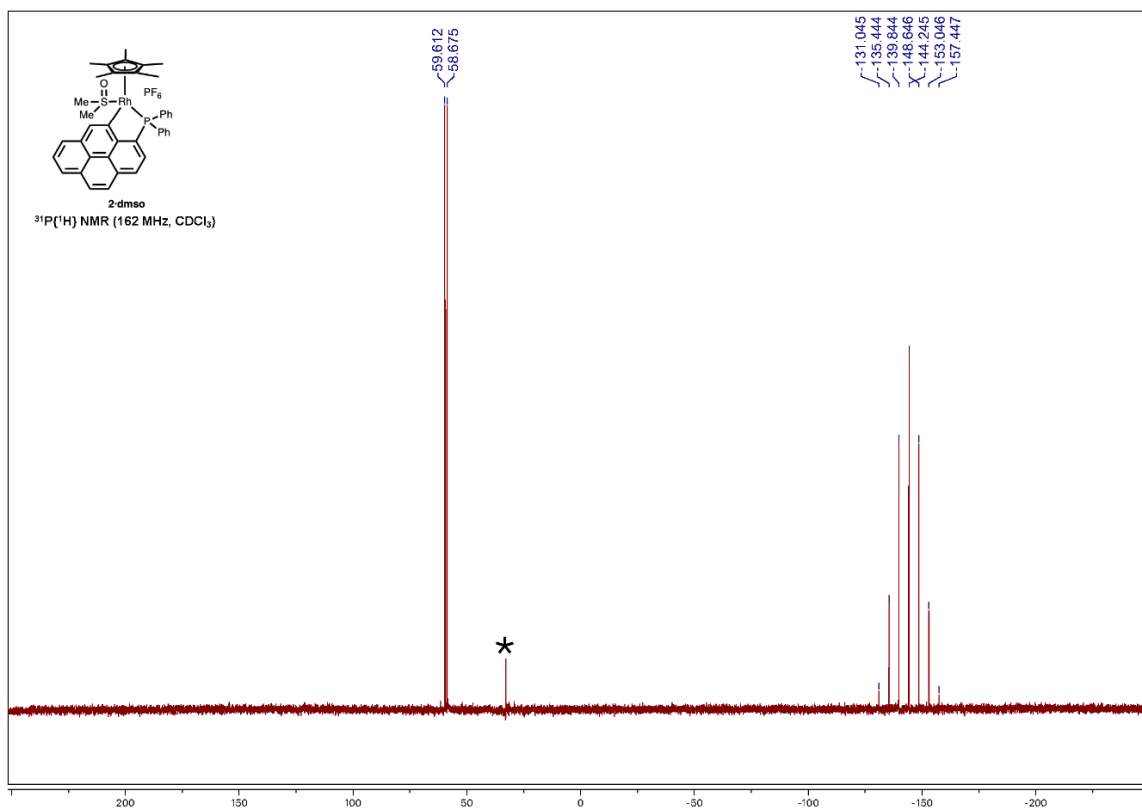

**Figure S30.**  $^{31}\text{P}\{^1\text{H}\}$  NMR spectrum of **2**-DMSO in  $\text{CDCl}_3$ . \*: traces of the oxide of the free phosphane ligand.

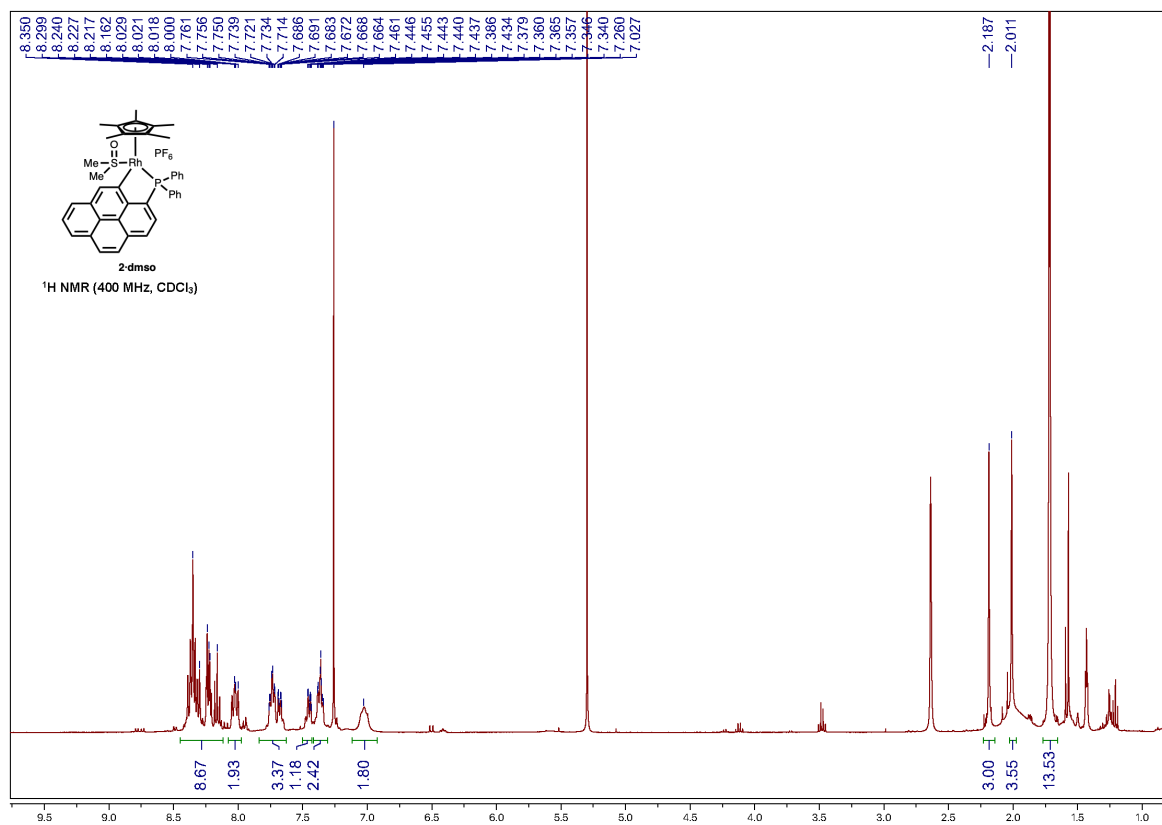

**Figure S31.**  $^1\text{H}$  NMR spectrum of **2**-DMSO in  $\text{CDCl}_3$ .

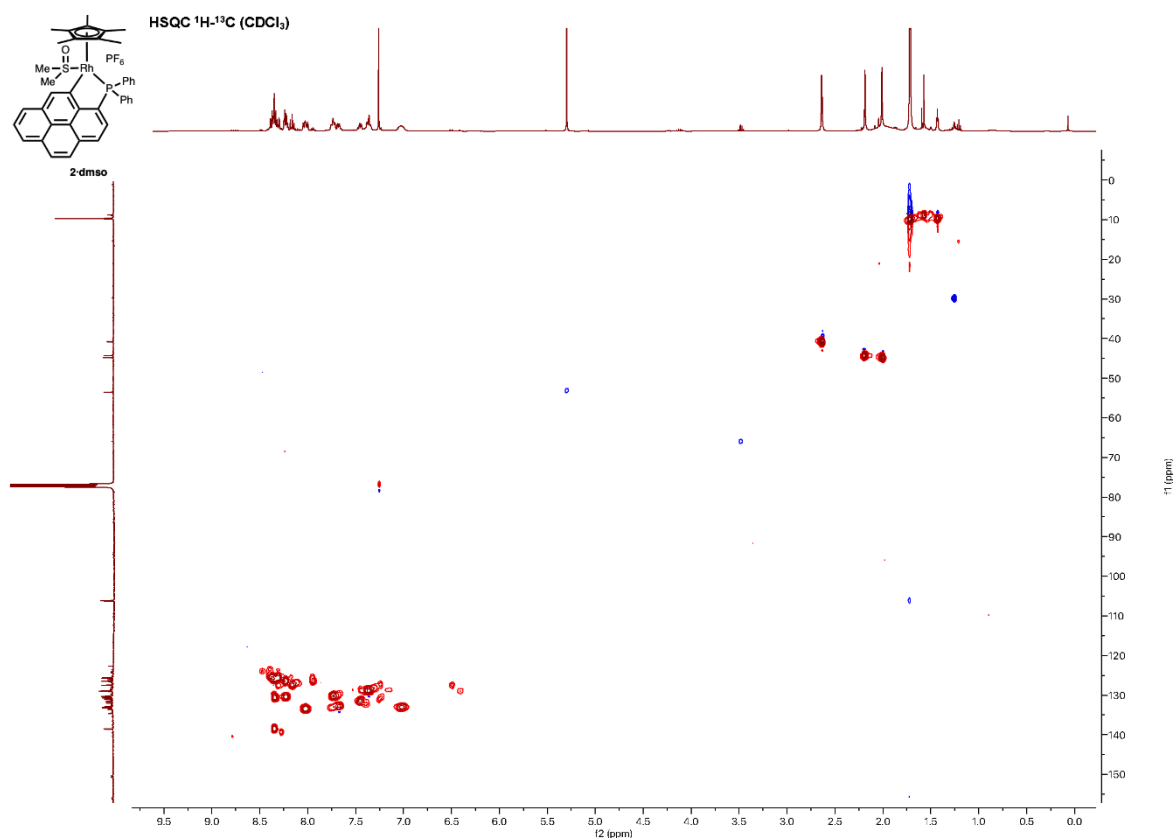

Figure S32.  $^1\text{H}$ - $^{13}\text{C}$  HSQC NMR spectrum of 2·DMSO in  $\text{CDCl}_3$ .

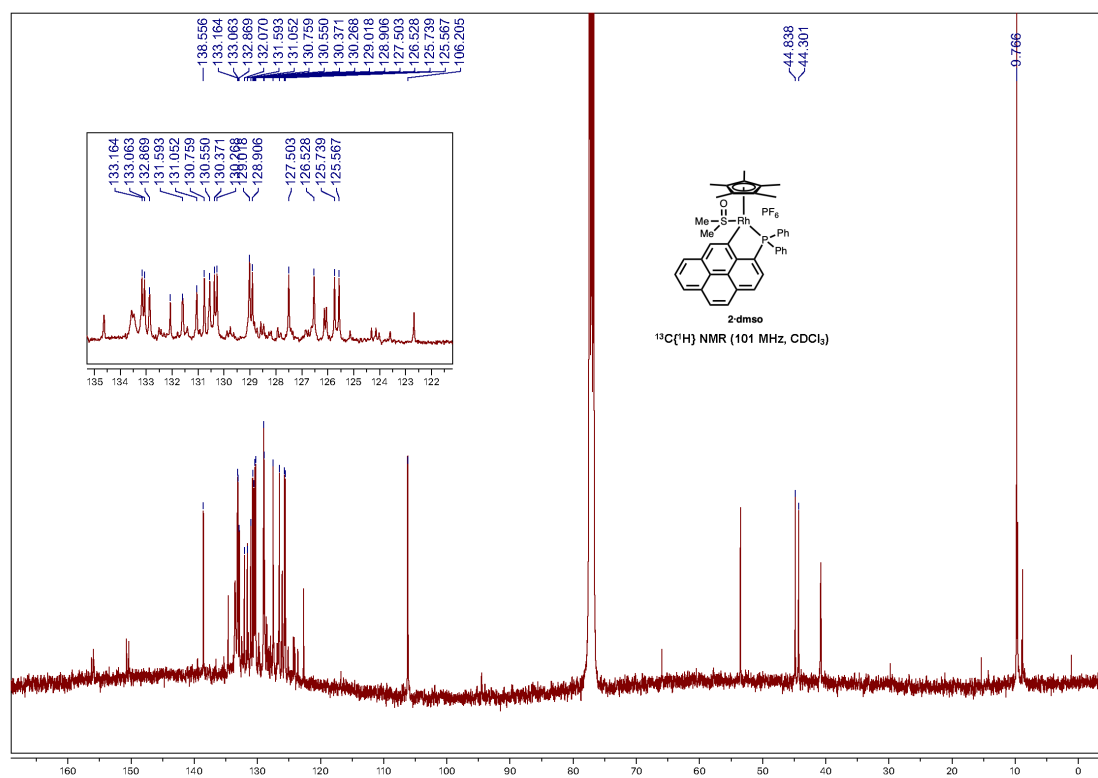

Figure S33.  $^{13}\text{C}$  NMR spectrum of 2·DMSO in  $\text{CDCl}_3$ .

## References

1. C. Sire, H. Cattey, A. Tsivory, J. C. Hierso and J. Roger, Phosphorus-Directed Rhodium-Catalyzed C-H Arylation of 1-Pyrenylphosphines Selective at the *K*-Region, *Adv. Synth. Catal.*, 2022, **364**, 440-452.
